# Supplementary material for: Oto-facial syndrome and esophageal atresia, intellectual disability and zygomatic anomalies - expanding the phenotypes associated with EFTUD2 mutations
Source: PubMed Central journal article supplement (PMC3727992; doi:10.1186/1750-1172-8-110), 2013-07-24
Supplement: 1750-1172-8-110-S1.pdf [file 1750-1172-8-110-S1.pdf]

## Supplemental Material

### Oto-facial syndrome and esophageal atresia, intellectual disability and zygomatic anomalies - expanding the phenotypes associated with *EFTUD2* mutations

#### Supplementary Figure 1:

Craniofacial phenotype of patients without *EFTUD2* mutation. A. Patient 13 with mild right-sided hemifacial microsomia. B-D- Patient 17 with bilateral cleft lip/palate, right-sided microtia and left-sided preauricular tags. E, F. Patient 21 with right-sided hemifacial microsomia and microtia at both sides. G, H. Patient 15 with left-sided hemifacial microsomia and left-sided mirror-ear.

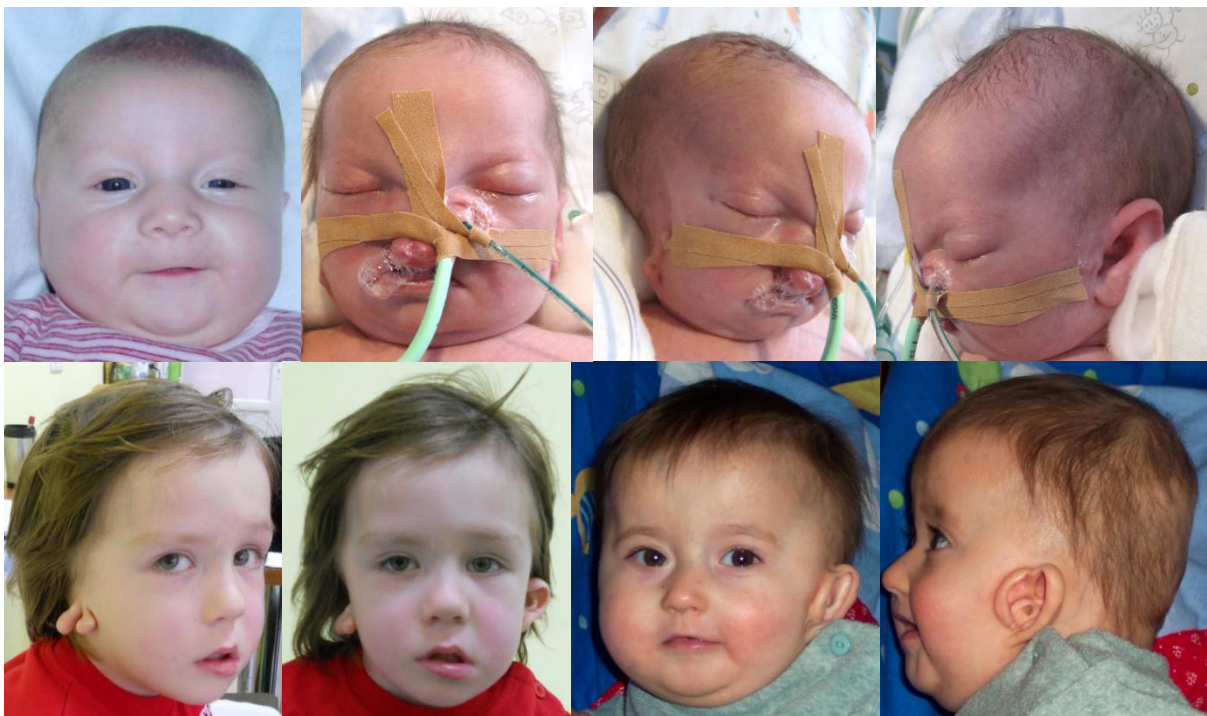

Supplementary Table 1: All reported *EFTUD2* mutations organized to their location within the gene and the associated clinical findings

|    | Patient / Case [ref]      | nucleotide position                           | amino acid substitution | microcephaly | short stature | ID                 | thumb anomaly | esophageal atresia | CHD       |
|----|---------------------------|-----------------------------------------------|-------------------------|--------------|---------------|--------------------|---------------|--------------------|-----------|
| 1  | Patient 8 [this report]   | c.253-1G>A                                    | splice                  | +            | -             | Mild               | -             | +                  | -         |
| 2  | Patient 2 [9]             | c.351-1G>T                                    | splice                  | +            | +             | mod. to severe     | -             | -                  | +         |
| 3  | Patient 6 [this report]   | c.594T>G                                      | p.Tyr198*               | +            | -             | moderate           | -             | +                  | +         |
| 4  | Case 6 [3]                | c.619+1G>A                                    | splice                  | +            | -             | +                  | -             | +                  | -         |
| 5  | Case 7 [3]                | c.623A>G                                      | p.His208Arg             | +            | -             | ++                 | -             | +                  | -         |
| 6  | Case 10 [3]               | c.670G>A                                      | p.Gly224Arg             | +            | -             | ++                 | -             | -                  | -         |
| 7  | Patient 7 [15]            | c.698del                                      | p.Glu233Glyfs*3         | +            | n.r.          | +                  | -             | -                  | +         |
| 8  | Patient 2 [5]             | c.784C>T                                      | p.Arg262Trp             | +            | -             | mild to moderate   | -             | -                  | +         |
| 9  | Patient 6 [5]             | c.784_787deldup788_799TGATCCTGGAGC            | p.Arg262fs*1            | +            | +             | +                  | +             | -                  | +         |
| 10 | Patient 1 [15]            | c.994+5G>A                                    | splice                  | +            | n.r.          | +                  | +             | +                  | -         |
| 11 | Patient 1-3 [this report] | c.994+1G>C                                    | splice                  | +/-          | -/+           | mild/severe/-      | -/-           | +/-                | +/-       |
| 12 | Case 12 [3]               | c.1058+3_1058+7del                            | ?                       | -            | -             | -                  | +             | +                  | +         |
| 13 | Patient 7 [5]             | c.1172_1179delIGCCTCCCA                       | p.Ser391Thrfs*57        | +            | -             | moderate           | -             | -                  | +         |
| 14 | Patient 3 [9]             | c.1306C>G                                     | p.Gln436Glu             | +            | +             | Mild               | +             | -                  | -         |
| 15 | Patient 12 [5]            | c.1426T>C                                     | p.Cys476Arg             | +            | -             | moderate           | +             | -                  | -         |
| 16 | Patient 10 [5]            | c.1607+3A>G                                   | p.Tyr537fs*25           | +            | -             | mild to moderate   | n.r.          | -                  | +         |
| 17 | Case 5 [3]                | c.1705C>T                                     | p.Arg569*               | +            | -             | +                  | -             | +                  | -         |
| 18 | Patient 4 [5]             | c.1758_1759delTG                              | p.Ser586Serfs*19        | +            | -             | mod. to severe     | n.r.          | -                  | -         |
| 19 | Patient 11 [5]            | c.1910T>C                                     | p.Leu637Arg             | +            | +             | mild to moderate   | -             | -                  | -         |
| 20 | Patient 8 [5]             | c.2155C>T                                     | p.Gln719*               | +            | -             | moderate           | -             | -                  | -         |
| 21 | Case 8 [3]                | c.2198G>A                                     | p.Trp733*               | +            | -             | ++                 | -             | -                  | +         |
| 22 | Case 3 [3]                | c.2259+1G>A                                   | splice                  | +            | +             | ++                 | -             | +                  | +         |
| 23 | Case 9 [3]                | c.2347+66A>G                                  | ?                       | -            | -             | +                  | -             | +                  | +         |
| 24 | Patient 1 [9]             | c.2485G>A                                     | p.Glu829Lys             | -            | -             | Mild               | +             | -                  | -         |
| 25 | Patient 9 [5]             | c.2493C>A                                     | p.Tyr831*               | +            | -             | severe             | +             | -                  | +         |
| 26 | Patient [8]               | c.2495C>G                                     | p.Tyr832*               | +            | n.r.          | n.r.               | +             | -                  | n.r.      |
| 27 | Patient 7 [this report]   | c.2562-1G>C                                   | splice                  | +            | -             | moderate           | +             | -                  | -         |
| 28 | Case 4 [3]                | c.2619_2621delinsGGTC                         | p.Phe874Valfs*11        | +            | -             | ++                 | +             | -                  | -         |
| 29 | Patient 4,5 [this report] | c.2622dupT                                    | p.Ile875Tyrfs*10        | +/n.r.       | -/n.r.        | mild/mild          | -/-           | +/-                | n.r./n.r. |
| 30 | Patient 3 [5]             | c.2770C>T                                     | p.Glu924*               | +            | -             | Mild               | +             | -                  | -         |
| 31 | Case 11 [3]               | c.2823+1del                                   | splice                  | n.r./+       | n.r./-        | n.r./+             | -/-           | +/-                | -/-       |
| 32 | Patient 5 [5]             | deletion of 10 genes, including <i>EFTUD2</i> |                         | +            | -             | moderate to severe | n.r.          | -                  | +         |
| 33 | Case 1 [3]                | deletion of 4 genes, including <i>EFTUD2</i>  |                         | -            | -             | ++                 | -             | +                  | -         |
| 34 | Case 2 [3]                | deletion of 4 genes, including <i>EFTUD2</i>  |                         | +            | n.r.          | ++                 | -             | +                  | +         |
| 35 | Patient 1 [5]             | deletion of the last 9 exons of <i>EFTUD2</i> |                         | +            | -             | +                  | +             | -                  | -         |
|    |                           |                                               |                         | 32/37        | 6/33          | 2/37               | 12/36         | 15/39              | 16/36     |

We changed the mutations from Luquetti et al. according to the described genomic position.
